# Supplementary material for: Terpyridine-based Pd(ii)/Ni(ii) organometallic framework nano-sheets supported on graphene oxide—investigating the fabrication, tuning of catalytic properties and synergetic effects
Source: Royal Society of Chemistry journal article supplement (doi:10.1039/d0ra02195d), 2020-01-01
Supplement: d0ra02195d1.pdf [file d0ra02195d1.pdf]

# Terpyridine Based Pd(II)/Ni(II) Organometallic Framework Nano-Sheet Supported on Graphene Oxide—Investigating on Fabrication, Turning on Catalytic Properties and Synergetic

Ruirui Ren <sup>a†</sup>, Sa Bi, <sup>a†</sup> Linhong Wang, <sup>a</sup> Wuduo Zhao, <sup>a</sup> Donghui Wei, <sup>a</sup> Tiesheng Li, <sup>a\*</sup> Wenjian Xu, <sup>a</sup> Minghua Liu, <sup>b,c\*</sup> Yangjie Wu <sup>a\*</sup>

<sup>a</sup>College of Chemistry, Zhengzhou University, Zhengzhou, 450001, P. R. China.

<sup>b</sup> Henan Institute of Advanced Technology, Zhengzhou University, Zhengzhou 450001, P. R. China.

<sup>c</sup>Beijing National Laboratory for Molecular Science, Institute of Chemistry, Chinese Academy of Sciences, Zhongguancun North First Street 2, Beijing 100190, P. R. China.

<sup>†</sup>Contributed equally to this work

## 1. Experimental section

### 1.1 General methods

Chemicals were obtained from commercial sources. Solvents were distilled using appropriate drying agents under nitrogen. X-Ray diffraction (XRD) was performed on a PAN analytical X-Pert PRO instrument. Fourier transform infrared (FTIR) spectroscopy was carried out on a BRUKER TENSOR FTIR spectrometer using KBr pellets. Raman spectra were measured with a Thermo Scientific DXR Raman microscope with an excitation laser wavelength of 532 nm. XPS data were obtained using an ESCALab220i-XL electron spectrometer from VG Scientific with 300 W Al K $\alpha$  radiation. Scanning electron microscopy (SEM) images were recorded using a Hitachi S-4800 system. Transmission electron microscopy (TEM) images were recorded using a JEM-2100F transmission electron microscope operating at 200 kV. The Pd and Ni content in the catalysts before and after the cross-coupling reactions was measured by inductively coupled plasma atomic emission spectroscopy (ICP-AES) with an ICAP 6000 Series (Thermo Scientific). The sample treatments were as

follows: the sample was broken down with nitrolysis, and then residual solid was dissolved with 2 M hydrochloric acid and transferred into a 10 mL volumetric flask to fix its quantity in water.  $^1\text{H}$  NMR and  $^{13}\text{C}$  NMR spectra were recorded on a Bruker Advance III 400 MHz spectrometer in  $\text{CDCl}_3$  with tetramethylsilane as an internal standard. A Vertex 70 V spectrometer (Bruker Optik, Ettlingen, Germany) at 293 K, with a spectral resolution of  $4\text{ cm}^{-1}$  and a scanner velocity of 10 kHz was used for monitoring the coupling reaction of 4-bromotoluene with phenylboronic acid. QCM data were recorded on a QCM-2CA (Henan Kerui science and Tech Cop).

## 1.2. General procedure

### 1.2.1 Synthesis of functionalized GO with imine ligand, **GO@Tpy-Ni/Pd**

The aryl imine ligand, functionalized **GO** with aryl imine ligand (**GO@Tpy**) and **GO@Tpy-Ni/Pd** monolayer were prepared according to the literature reports.<sup>[27k]</sup> **GO@Tpy** (1.1g) is dissolved in 30 mL of EtOH (anhydrous) and sonicated for 0.5 h. Then, a mixture with certain atom ratio of **Ni** to **Pd** was added at 40 °C for 12 h. **GO@Tpy-Ni/Pd** is filtrated, washed with certain solvents and dried in vacuum at 40 °C for 24 h. The real atomic ratios in the as-prepared **GO@Tpy-Ni/Pd** are further determined by ICP–AES. **SiO<sub>2</sub>@Tpy-Ni/Pd** is synthesized with similar way for **GO@Tpy-Ni/Pd**.

### 1.2.2 Procedure for Suzuki reaction and recycling

**Si@Tpy-Pd/Ni** (2.5cm×1cm×0.1cm), base, and reactant were added to a 10 mL round-bottom flask with 4 mL solvent. The reaction was carried out in an oil bath at 80 °C or 100°C for a certain time. The catalysts were separated from the reaction mixture. For the recycling experiments, the reactions were carried out under the above conditions. After each run, the used catalyst was recovered from the reaction mixture

and reused in sequential runs after washing with ethyl acetate, methyl alcohol, and water three times.

### 1.2.3 ReactIR dynamic analysis

ReactIR analysis are carried out as report. [36] A 10 mL two-neck flask with a magnetic stirrer bar was equipped with the ReactIR probe to monitor the reaction in a 70 °C oil bath. 4 mL solvent, 1.0 mmol reactant, and 2.0 mmol  $K_2CO_3$  were added to the two-neck flask and dispersed by rapid ultrasonic processing. After that, a background spectrum was recorded. Then scans were performed in the time resolved spectroscopy (TRS) mode with 60 s intervals for 30 min.

## 2. Characterization of GO@Tpy-Ni/Pd monolayer

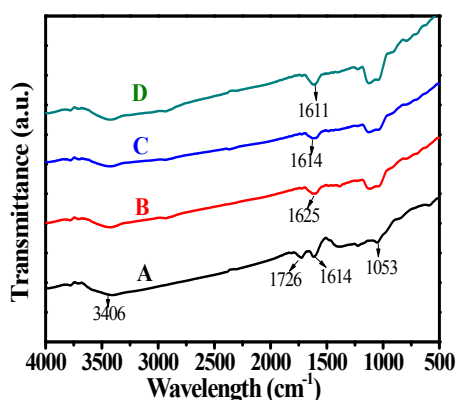

Figure S1 FT-IR spectra of (A) GO, (B) GO@APTES, (C) GO@Tpy and (D) GO@Tpy-Pd/Ni.

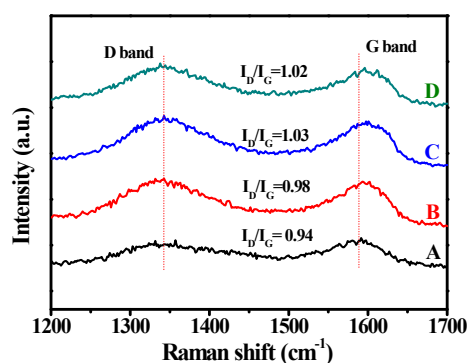

Figure S2 Raman spectra of (A) GO, (B) GO@APTES, (C) GO@Tpy and (D) GO@Tpy-Pd/Ni.

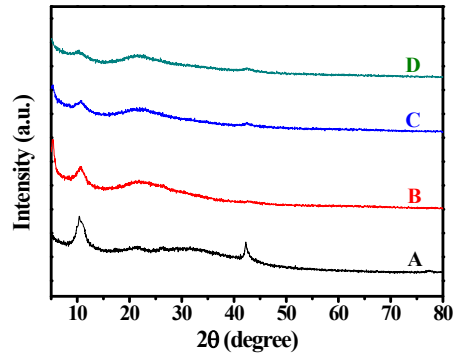

**Figure S3** XRD patterns of the self-assembly process of GO@Tpy-Pd/Ni. (A) GO, (B) GO@APTES, (C) GO@Tpy and (D) GO@Tpy-Pd/Ni.

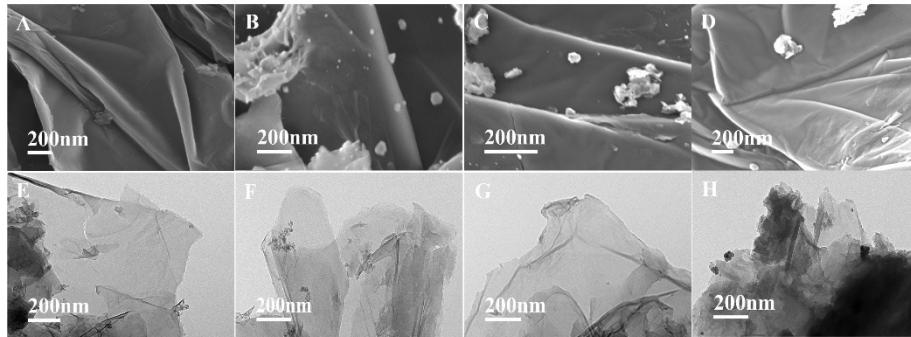

**Figure S4** SEM and TEM images of the assembly process of GO@Tpy-Pd/Ni. (A, E) GO, (B, F) GO@APTES, (C, G) GO@APTES-Tpy, (D, H) GO@Tpy-Pd/Ni.

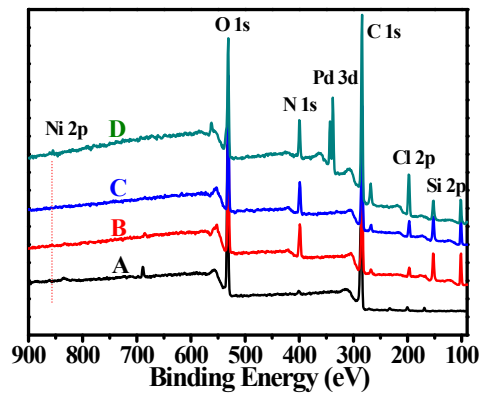

**Figure S5** XPS of the self-assembly process of GO@Tpy-Pd/Ni. (A) GO, (B) GO@APTES, (C) GO@Tpy and (D) GO@Tpy-Pd/Ni.

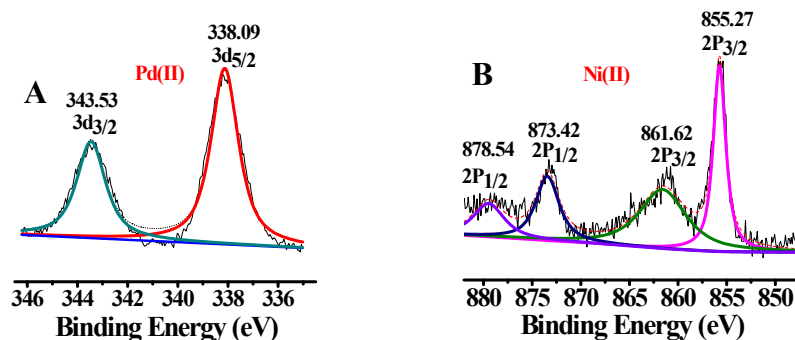

Figure S6 High resolution XPS of (A):Pd 3p, (B):Ni 2p.

### 3. Investigation on catalytic properties of GO-Tpy-Pd/Ni monolayer

Table S1 The catalytic properties of GO@Tpy-Pd/Ni for Suzuki coupling reaction

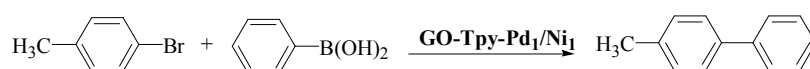

| Entry | Base                            | Solvent                    | T(°C) | Time (h)       | Yield (%) <sup>b</sup> |
|-------|---------------------------------|----------------------------|-------|----------------|------------------------|
| 1     | K <sub>2</sub> CO <sub>3</sub>  | MeOH                       | 80    | 12             | 86                     |
| 2     | K <sub>2</sub> CO <sub>3</sub>  | EtOH                       | 80    | 12             | 88                     |
| 3     | K <sub>2</sub> CO <sub>3</sub>  | EA                         | 80    | 12             | 11                     |
| 4     | K <sub>2</sub> CO <sub>3</sub>  | DMF                        | 80    | 12             | trace                  |
| 5     | K <sub>2</sub> CO <sub>3</sub>  | H <sub>2</sub> O           | 80    | 12             | 52                     |
| 6     | K <sub>2</sub> CO <sub>3</sub>  | H <sub>2</sub> O: EtOH=1:1 | 80    | 12             | 86                     |
| 7     | K <sub>2</sub> CO <sub>3</sub>  | H <sub>2</sub> O: EtOH=1:3 | 80    | 12             | 94                     |
| 8     | K <sub>2</sub> CO <sub>3</sub>  | H <sub>2</sub> O: EtOH=1:5 | 80    | 12             | 76                     |
| 9     | K <sub>3</sub> PO <sub>4</sub>  | H <sub>2</sub> O: EtOH=1:3 | 80    | 12             | 65                     |
| 10    | Na <sub>2</sub> CO <sub>3</sub> | H <sub>2</sub> O: EtOH=1:3 | 80    | 12             | 74                     |
| 11    | NaOH                            | H <sub>2</sub> O: EtOH=1:3 | 80    | 12             | 45                     |
| 12    | K <sub>2</sub> CO <sub>3</sub>  | H <sub>2</sub> O: EtOH=1:3 | 35    | 12             | 94                     |
| 13    | K <sub>2</sub> CO <sub>3</sub>  | H <sub>2</sub> O: EtOH=1:3 | 35    | 10             | 93                     |
| 14    | K <sub>2</sub> CO <sub>3</sub>  | H <sub>2</sub> O: EtOH=1:3 | 35    | 8              | 94                     |
| 15    | K <sub>2</sub> CO <sub>3</sub>  | H <sub>2</sub> O: EtOH=1:3 | 35    | 6              | 82                     |
| 16    | K <sub>2</sub> CO <sub>3</sub>  | H <sub>2</sub> O: EtOH=1:3 | 35    | 8 <sup>c</sup> | 96                     |
| 17    | K <sub>2</sub> CO <sub>3</sub>  | H <sub>2</sub> O: EtOH=1:3 | 35    | 8 <sup>d</sup> | 96                     |
| 18    | K <sub>2</sub> CO <sub>3</sub>  | H <sub>2</sub> O: EtOH=1:3 | 35    | 8 <sup>e</sup> | 93                     |
| 19    | K <sub>2</sub> CO <sub>3</sub>  | H <sub>2</sub> O: EtOH=1:3 | 35    | 8 <sup>f</sup> | 51                     |

<sup>a</sup>Reaction condition: 4-bromotoluene (0.1 mmol), of PhB(OH)<sub>2</sub> (0.15mmol), base(0.2mmol), GO@Tpy-Pd<sub>1</sub>/Ni<sub>1</sub>: 3mg, solvent (5.0 mL) at 80 °C, <sup>b</sup>isolated yield.

<sup>c</sup>GO@Tpy-Pd<sub>1</sub>/Ni<sub>1</sub>: 2mg,

<sup>d</sup>GO@Tpy-Pd<sub>1</sub>/Ni<sub>1</sub>: 1mg.

<sup>e</sup>PhB(OH)<sub>2</sub> (0.35 mmol), 4-bromotoluene (0.3mmol), Base (0.6 mmol), GO@Tpy-Pd<sub>1</sub>/Ni<sub>1</sub>: 1mg.

<sup>f</sup>PhB(OH)<sub>2</sub> (0.55mmol), 4-bromotoluene (0.5mmol), Base (1 mmol), GO@Tpy-Pd<sub>1</sub>/Ni<sub>1</sub>: 1 mg.

Table S2 Catalytic activity of **GO@Tpy-Pd/Ni<sub>x</sub>** for Suzuki–Miyaura reaction.<sup>a</sup>

| Catalyst                                     | Pd loading (mol. g <sup>-1</sup> ) | Ni loading (mol. g <sup>-1</sup> ) | Pd\Ni   | Yield/% <sup>b</sup> | TON   |
|----------------------------------------------|------------------------------------|------------------------------------|---------|----------------------|-------|
| <b>GO-Tpy-Pd</b>                             | $7.11 \times 10^{-5}$              | 0                                  | -       | 91                   | 3839  |
| <b>GO-Tpy-Pd<sub>1</sub>/Ni<sub>1</sub></b>  | $6.14 \times 10^{-5}$              | $6.83 \times 10^{-6}$              | 1: 0.11 | 93                   | 4544  |
| <b>GO-Tpy-Pd<sub>1</sub>/Ni<sub>10</sub></b> | $1.82 \times 10^{-5}$              | $2.93 \times 10^{-5}$              | 1: 1.6  | 96                   | 15824 |
| <b>GO-Tpy-Pd<sub>1</sub>/Ni<sub>20</sub></b> | $8.65 \times 10^{-6}$              | $3.11 \times 10^{-5}$              | 1: 3.6  | 41                   | 14219 |
| <b>GO-Tpy-Ni</b>                             | 0.00                               | $3.28 \times 10^{-5}$              | 0: 1.0  | 17                   | 1555  |

<sup>a</sup>Reaction condition: PhB(OH)<sub>2</sub> (0.35 mmol), 4-bromotoluene (0.3mmol), Base (0.6 mmol), **GO@Tpy-Pd/Ni** : 1 mg. solvent (5.0 mL) at 35°C for 8h. <sup>b</sup> isolated yield

Table S3 Suzuki–Miyaura reaction of aryl halides with different arylboronic acids

| Entry | Ar-X                                                                                | Ar'-B(OH) <sub>2</sub>                                                              | Product                                                                             | Yield (%) <sup>b</sup> | TON   | TOF (h <sup>-1</sup> ) |
|-------|-------------------------------------------------------------------------------------|-------------------------------------------------------------------------------------|-------------------------------------------------------------------------------------|------------------------|-------|------------------------|
| 1     |    |    |    | 81                     | 13351 | 1669                   |
| 2     |    |    |    | 90                     | 14835 | 1854                   |
| 3     |    |    |    | 93                     | 15329 | 1916                   |
| 4     |  |  |  | 90                     | 14835 | 1854                   |
| 5     |  |  |  | 95                     | 15659 | 1957                   |
| 6     |  |  |  | 98                     | 16154 | 2019                   |
| 7     |  |  |  | 23                     | 3791  | 473                    |
| 8     |  |  |  | 12                     | 1978  | 274                    |
| 9     |  |  |  | 93                     | 15329 | 1916                   |
| 10    |  |  |  | 37                     | 6099  | 762                    |

Table 4 Comparison of the results for the Suzuki reaction using the **GO@Tpy-Pd<sub>1</sub>/Ni<sub>10</sub>** with that reported Ni or Pd-based catalysts

| Entry | catalyst                                     | Pd/Ni loading (mol%)                                 | Reaction condition              | Yield (%) | TOF                   | Ref.             |
|-------|----------------------------------------------|------------------------------------------------------|---------------------------------|-----------|-----------------------|------------------|
| 1     | <b>GO@Tpy-Pd<sub>1</sub>/Ni<sub>10</sub></b> | $1.82 \times 10^{-5}$ Pd<br>$2.93 \times 10^{-5}$ Ni | EtOH/H <sub>2</sub> O,<br>35 °C | 96        | 1978<br>(based on Pd) | <b>This work</b> |
| 2     | Pd1Ni2                                       | 2.0 Pd<br>4.0 Ni                                     | DMF, 140 °C                     | 91        | 5<br>(based on Pd)    | 7                |
| 3     | Ni0.9Pd0.1                                   | 0.2 Pd<br>1.8 Ni                                     | EtOH/H <sub>2</sub> O,<br>50 °C | 71        | 15<br>(based on Pd)   | 8                |

|           |                                             |                          |                                |       |               |    |
|-----------|---------------------------------------------|--------------------------|--------------------------------|-------|---------------|----|
| <b>4</b>  | Pd-Ni alloy                                 | 2.0 Pd                   | 1,4-dioxane, 100 °C            | 92    | 3.8           | 61 |
|           |                                             | 2.0 Ni                   |                                |       | Based on Pd   |    |
| <b>5</b>  | Ni <sub>0.20</sub> Pd <sub>0.05</sub> /CB   | 0.1 Pd                   | EtOH/H <sub>2</sub> O, 30 °C   | 88    | 1333          | 63 |
|           |                                             | 0.4 Ni                   |                                |       | (based on Pd) |    |
| <b>6</b>  | NPFNP-2                                     | 0.3 Pd                   | EtOH/H <sub>2</sub> O, 50 °C   | 93    | 270           | 64 |
|           |                                             | 0.24 Ni                  |                                |       | (based on Pd) |    |
| <b>7</b>  | Pd <sub>50</sub> Ni <sub>50</sub> /MWCNTs   | 0.1 Pd                   | H <sub>2</sub> O, 120 °C, TBAB | >99   | 1000          | 65 |
|           |                                             | 0.1 Ni                   |                                |       | (based on Pd) |    |
| <b>8</b>  | Pd <sub>1</sub> Ni <sub>4</sub> /CNF        | 1.25×10 <sup>-3</sup> Pd | EtOH/H <sub>2</sub> O, 80 °C   | 98.74 | 263           | 67 |
|           |                                             | 5.1×10 <sup>-3</sup> Ni  |                                |       | Based on Pd   |    |
| <b>9</b>  | Ni <sub>0.99</sub> Pd <sub>0.01</sub> alloy | 0.02 Pd                  | EtOH/H <sub>2</sub> O, 50 °C   | 72    | 3600          | 69 |
|           |                                             | 1.98 Ni                  |                                |       | (based on Pd) |    |
| <b>10</b> | G-Ni/Pd (Ni/Pd = 3/2)                       | 0.91 Pd                  | DMF/H <sub>2</sub> O, 110 °C   | 78    | 171           | 79 |
|           |                                             | 1.37 Ni                  |                                |       | (based on Pd) |    |

Table S5 Poisoning experiments of **GO@Tpy-Pd/Ni** catalyst.<sup>a</sup>

| Entry                | poisoning additive | Isolated yield (%) <sup>d</sup> |
|----------------------|--------------------|---------------------------------|
| <b>1</b>             | —                  | 93                              |
| <b>2<sup>b</sup></b> | Hg                 | 19                              |
| <b>3<sup>c</sup></b> | Thiophene          | 11                              |

<sup>a</sup> Reaction condition: PhB(OH)<sub>2</sub> (0.35 mmol), Base (0.6 mmol), 4-bromotoluene (0.3 mmol), **GO-Tpy-Pd<sub>i</sub>/Ni<sub>10</sub>**: 1 mg, solvent (5.0 mL) at 35 °C for 8 h. <sup>b</sup> One drop of Hg. <sup>c</sup> 0.5 equiv of thiophene (per metal atom). <sup>d</sup> Isolated yield.

Table S6 EB values between active sites and substrates

| Active site and Substrate | ΔG (a.u) | BE (kcal/mol) |
|---------------------------|----------|---------------|
| A                         | -1368.4  |               |
| B                         | -1411.0  |               |
| C                         | -908.3   |               |
| S1                        | -408.2   |               |
| S2                        | -284.0   |               |
| CP                        | -502.5   |               |
| A+ S1                     | -1776.6  | 7.7           |
| A+ S2                     | -1652.5  | 3.8           |
| B+ S1                     | -1819.2  | 7.8           |
| B+ S2                     | -1695.1  | 3.2           |

|       |         |      |
|-------|---------|------|
| C+ S1 | -1316.5 | 1.4  |
| C+ S2 | -1192.4 | 4.7  |
| A+ CP | -1870.9 | 10.7 |
| B+ CP | -1913.5 | 12.6 |
| C+ CP | -1410.8 | 11.2 |

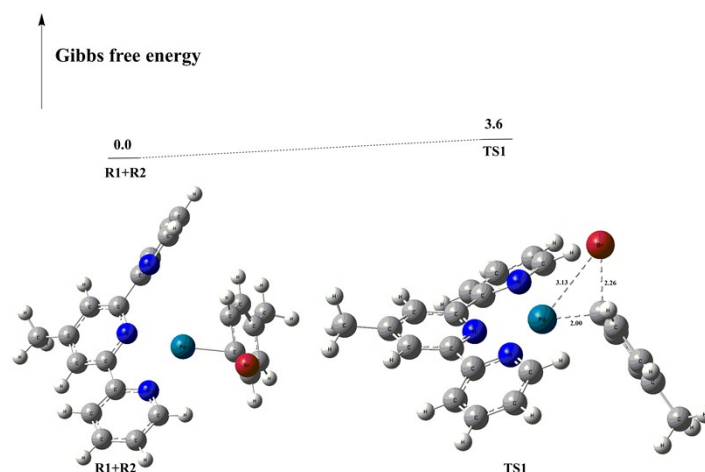

Figure S7. The Gibbs free energy barrier of the oxidative insertion catalyzed by Pd(0) (energy in kcal/mol, distance in Å)

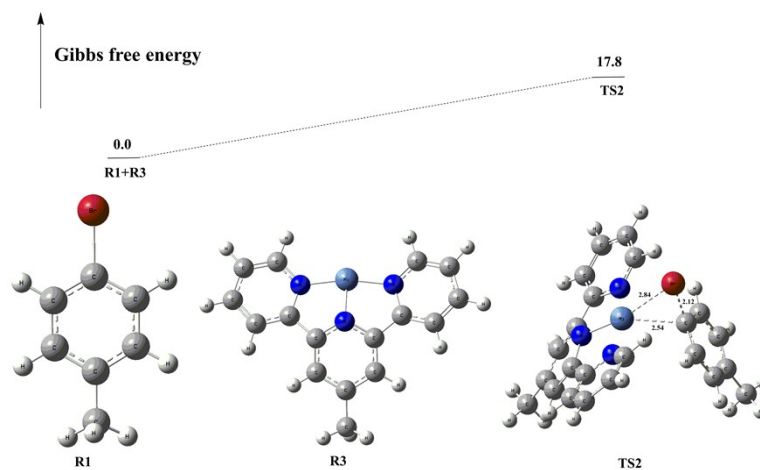

Figure S8. The Gibbs free energy barrier of the oxidative insertion catalyzed by Ni(0) (energy in kcal/mol, distance in Å)

## Computational Methods:

The DFT calculations were performed using the Gaussian 09 program<sup>[1]</sup>. The geometries were fully optimized using B3LYP method<sup>[2, 3]</sup>. Basis set 6-31+G(d) was employed for H, C, and N atoms, while LANL2DZ was used for Pd, Ni and Br



atoms<sup>[4]</sup>. Then, frequency calculations at the same level of theory were carried out to identify all of the stationary points as minima (zero imaginary frequency) or transition state (only one frequency), and to provide corrections for free energies.

## References

- [1] G.W. Trucks, M.J. Frisch, H.B. Schlegel, G.E. Scuseria, M.A. Robb, J.R. Cheeseman, G. Scalmani, V. Barone, B. Mennucci, G.A. Petersson, H. Nakatsuji, M. Caricato, X. Li, H.P. Hratchian, A.F. Izmaylov, J. Bloino, G. Zheng, J.L. Sonnenberg, M. Hada, M. Ehara, K. Toyota, R. Fukuda, J. Hasegawa, M. Ishida, T. Nakajima, Y. Honda, O. Kitao, H. Nakai, T. Vreven, J.A. Montgomery, Jr, J.E. Peralta, F. Ogliaro, M. Bearpark, J.J. Heyd, E. Brothers, K.N. Kudin, V.N. Staroverov, T. Keith, R. Kobayashi, J. Normand, K. Raghavachari, A. Rendell, J.C. Burant, S.S. Iyengar, J. Tomasi, M. Cossi, N. Rega, J.M. Millam, M. Klene, J.E. Knox, J.B. Cross, V. Bakken, C. Adamo, J. Jaramillo, R. Gomperts, R.E. Stratmann, O. Yazyev, A.J. Austin, R. Cammi, C. Pomelli, J.W. Ochterski, R.L. Martin, K. Morokuma, V.G. Zakrzewski, G.A. Voth, P. Salvador, J.J. Dannenberg, S. Dapprich, A.D. Daniels, O. Farkas, J.B. Foresman, J.V. Ortiz, J. Cioslowski, D.J. Fox, Revision C.01, (2010).
- [2] A.D. Becke, J. Chem. Phys., 1993, 98, 5648.
- [3] C.T. Lee, W.T. Yang, R.G. Parr, Phys. Rev. B., 1988, 37, 785.
- [4] P. J. Hay, W. R. Wadt, J. Chem. Phys. 1985, 82, 299.

## Geometrical Coordinates of the Listed Complexes

### R1

s-2

Zero-point correction=0.117774

Thermal correction to Energy= 0.125429

Thermal correction to Enthalpy= 0.126374

Thermal correction to Gibbs Free Energy= 0.083865

Sum of electronic and zero-point Energies= -284.012700

Sum of electronic and thermal Energies= -284.005044

Sum of electronic and thermal Enthalpies= -284.004100

Sum of electronic and thermal Free Energies= -284.046608

Cartesian coordinates

|   |           |           |           |
|---|-----------|-----------|-----------|
| C | 0.312316  | -0.000033 | -0.000471 |
| C | -0.366751 | 1.213842  | -0.004435 |
| C | -1.762742 | 1.201116  | -0.010294 |
| C | -2.483896 | -0.000027 | -0.010151 |
| C | -1.762764 | -1.201143 | -0.010306 |
| C | -0.366737 | -1.213875 | -0.004424 |
| H | 0.177645  | 2.151398  | -0.006843 |
| H | -2.297185 | 2.147825  | -0.017095 |
| H | -2.297178 | -2.147867 | -0.017109 |

|    |           |           |           |
|----|-----------|-----------|-----------|
| H  | 0.177614  | -2.151457 | -0.006822 |
| C  | -3.994214 | 0.000038  | 0.015561  |
| H  | -4.372214 | 0.001290  | 1.045746  |
| H  | -4.403386 | 0.884838  | -0.481378 |
| H  | -4.403432 | -0.885912 | -0.479274 |
| Br | 2.284768  | 0.000011  | 0.003140  |

## R2

j3-1

Zero-point correction=0.254194

Thermal correction to Energy= 0.270111

Thermal correction to Enthalpy= 0.271055

Thermal correction to Gibbs Free Energy= 0.209988

Sum of electronic and zero-point Energies= -908.300142

Sum of electronic and thermal Energies= -908.284225

Sum of electronic and thermal Enthalpies= -908.283281

Sum of electronic and thermal Free Energies= -908.344348

Cartesian coordinates

|   |           |           |           |
|---|-----------|-----------|-----------|
| C | -3.622132 | 0.726053  | 0.633414  |
| C | -2.350942 | 0.299024  | 0.228235  |
| C | -3.182800 | -1.831372 | -0.218980 |
| C | -4.465995 | -1.471543 | 0.175277  |
| C | -4.692723 | -0.159732 | 0.604544  |
| H | -3.751828 | 1.741068  | 0.994277  |
| H | -2.970791 | -2.832796 | -0.579479 |
| H | -5.268948 | -2.199838 | 0.131586  |
| H | -5.680371 | 0.158338  | 0.924229  |
| C | -1.170867 | 1.183573  | 0.225896  |
| C | -1.198864 | 2.530482  | -0.134879 |
| C | 1.170863  | 1.183562  | 0.225836  |
| C | 0.000007  | 3.245570  | -0.281724 |
| H | -2.147573 | 3.016107  | -0.345946 |
| C | 1.198958  | 2.530368  | -0.134922 |
| H | 2.147705  | 3.015906  | -0.346066 |
| C | 2.350932  | 0.298922  | 0.228191  |
| C | 3.622088  | 0.725888  | 0.633487  |
| C | 4.692652  | -0.159951 | 0.604668  |
| H | 3.751800  | 1.740890  | 0.994378  |
| C | 3.182716  | -1.831468 | -0.219082 |
| C | 4.465900  | -1.471712 | 0.175302  |
| H | 5.680286  | 0.158060  | 0.924451  |
| H | 2.970693  | -2.832860 | -0.579656 |
| H | 5.268819  | -2.200046 | 0.131650  |

|    |           |           |           |
|----|-----------|-----------|-----------|
| N  | -2.135142 | -0.983787 | -0.213052 |
| N  | -0.000025 | 0.544123  | 0.500337  |
| N  | 2.135090  | -0.983846 | -0.213128 |
| Pd | -0.000032 | -1.481272 | -0.285763 |
| C  | 0.000317  | 4.709302  | -0.646901 |
| H  | -0.889757 | 4.979714  | -1.223033 |
| H  | 0.011396  | 5.341749  | 0.250566  |
| H  | 0.879934  | 4.974970  | -1.241149 |

### R3

A-Ni

Zero-point correction=0.254762

Thermal correction to Energy= 0.269976

Thermal correction to Enthalpy= 0.270920

Thermal correction to Gibbs Free Energy= 0.212454

Sum of electronic and zero-point Energies= -950.867664

Sum of electronic and thermal Energies= -950.852450

Sum of electronic and thermal Enthalpies= -950.851505

Sum of electronic and thermal Free Energies= -950.909972

Cartesian coordinates

|   |           |           |           |
|---|-----------|-----------|-----------|
| C | -3.651200 | 0.449404  | -0.285832 |
| C | -2.297797 | 0.123390  | -0.115420 |
| C | -2.866384 | -2.129705 | 0.216172  |
| C | -4.212149 | -1.865982 | 0.030686  |
| C | -4.618295 | -0.539948 | -0.206308 |
| H | -3.924155 | 1.475753  | -0.509063 |
| H | -2.517824 | -3.132259 | 0.443848  |
| H | -4.933383 | -2.673352 | 0.097133  |
| H | -5.667714 | -0.297903 | -0.341504 |
| C | -1.185109 | 1.052585  | -0.220549 |
| C | -1.202397 | 2.420765  | 0.030910  |
| C | 1.185097  | 1.052532  | -0.220751 |
| C | 0.000092  | 3.145519  | 0.107046  |
| H | -2.146809 | 2.925475  | 0.216469  |
| C | 1.202666  | 2.420591  | 0.030555  |
| H | 2.147198  | 2.925185  | 0.215874  |
| C | 2.297775  | 0.123147  | -0.115631 |
| C | 3.651141  | 0.449008  | -0.286252 |
| C | 4.618187  | -0.540417 | -0.206458 |
| H | 3.924167  | 1.475274  | -0.509770 |
| C | 2.866144  | -2.129853 | 0.216658  |
| C | 4.211941  | -1.866292 | 0.031046  |

|    |           |           |           |
|----|-----------|-----------|-----------|
| H  | 5.667619  | -0.298500 | -0.341776 |
| H  | 2.517506  | -3.132295 | 0.444690  |
| H  | 4.933105  | -2.673704 | 0.097755  |
| N  | -1.906989 | -1.175197 | 0.173851  |
| N  | -0.000046 | 0.402098  | -0.496047 |
| N  | 1.906837  | -1.175284 | 0.173930  |
| C  | 0.000567  | 4.623707  | 0.411291  |
| H  | -0.890598 | 5.113801  | 0.006555  |
| H  | 0.014460  | 4.818655  | 1.492126  |
| H  | 0.878519  | 5.118150  | -0.016625 |
| Ni | -0.000085 | -1.383440 | 0.115685  |

## TS1

pd-ts2

Zero-point correction=0.372536

Thermal correction to Energy=0.398658

Thermal correction to Enthalpy= 0.399602

Thermal correction to Gibbs Free Energy= 0.312140

Sum of electronic and zero-point Energies= -1192.331191

Sum of electronic and thermal Energies= -1192.305069

Sum of electronic and thermal Enthalpies= -1192.304125

Sum of electronic and thermal Free Energies= -1192.391587

Cartesian coordinates

|   |           |           |           |
|---|-----------|-----------|-----------|
| C | -1.840411 | 3.969943  | 0.188532  |
| C | -1.460114 | 2.655364  | -0.121919 |
| C | 0.684682  | 3.344213  | -0.620099 |
| C | 0.381698  | 4.680115  | -0.362533 |
| C | -0.908776 | 4.995550  | 0.060845  |
| H | -2.840777 | 4.181470  | 0.549377  |
| H | 1.685628  | 3.043996  | -0.914299 |
| H | 1.142536  | 5.444696  | -0.480601 |
| H | -1.182685 | 6.018875  | 0.299779  |
| N | -0.205279 | 2.351527  | -0.509394 |
| C | -2.420913 | 1.525642  | -0.022692 |
| C | -3.798717 | 1.728295  | -0.168675 |
| C | -4.681576 | 0.653047  | -0.055074 |
| H | -4.180492 | 2.716968  | -0.399942 |
| C | -2.740673 | -0.742562 | 0.339964  |
| C | -4.126497 | -0.600421 | 0.214627  |
| H | -4.768898 | -1.471460 | 0.290811  |
| N | -1.901420 | 0.305184  | 0.213998  |
| C | -2.124018 | -2.072197 | 0.591144  |
| C | -2.803656 | -3.086487 | 1.281806  |

|    |           |           |           |
|----|-----------|-----------|-----------|
| C  | -2.187284 | -4.324642 | 1.441085  |
| H  | -3.784926 | -2.902311 | 1.705556  |
| C  | -0.300650 | -3.447632 | 0.252494  |
| C  | -0.913867 | -4.516663 | 0.905781  |
| H  | -2.691646 | -5.123043 | 1.977413  |
| H  | 0.689760  | -3.538345 | -0.186023 |
| H  | -0.400950 | -5.468893 | 0.993189  |
| N  | -0.882308 | -2.251424 | 0.104441  |
| Pd | 0.360289  | -0.063908 | -0.119964 |
| C  | 3.420039  | -0.300707 | 1.936522  |
| C  | 4.113350  | 0.866568  | 1.605513  |
| C  | 3.935372  | 1.397219  | 0.312348  |
| C  | 3.086427  | 0.803077  | -0.612777 |
| C  | 2.341360  | -0.347614 | -0.246436 |
| C  | 2.570619  | -0.937497 | 1.021900  |
| H  | 3.564842  | -0.748535 | 2.917619  |
| H  | 4.490204  | 2.288145  | 0.022627  |
| H  | 3.003600  | 1.191182  | -1.622444 |
| H  | 2.132159  | -1.898846 | 1.263419  |
| Br | 2.191986  | -1.801173 | -1.965412 |
| C  | -6.164942 | 0.825067  | -0.262887 |
| H  | -6.440058 | 0.598655  | -1.300156 |
| H  | -6.738395 | 0.151017  | 0.380198  |
| H  | -6.482088 | 1.850782  | -0.055606 |
| C  | 5.036715  | 1.539622  | 2.593102  |
| H  | 5.997526  | 1.801166  | 2.135006  |
| H  | 4.604116  | 2.471303  | 2.981534  |
| H  | 5.241775  | 0.893206  | 3.451590  |

## TS2

qst3-a3

Zero-point correction= 0.372497

Thermal correction to Energy= 0.397907

Thermal correction to Enthalpy= 0.398851

Thermal correction to Gibbs Free Energy= 0.314821

Sum of electronic and zero-point Energies= -1234.870548

Sum of electronic and thermal Energies= -1234.845138

Sum of electronic and thermal Enthalpies= -1234.844194

Sum of electronic and thermal Free Energies= -1234.928224

Cartesian coordinates

|   |           |          |           |
|---|-----------|----------|-----------|
| C | -0.529627 | 2.948317 | -1.164276 |
| C | -0.137865 | 4.270498 | -1.290329 |

|   |           |           |           |
|---|-----------|-----------|-----------|
| C | 1.167285  | 4.631403  | -0.912445 |
| C | 2.022728  | 3.640345  | -0.458984 |
| C | 1.569444  | 2.316688  | -0.356172 |
| N | 0.268945  | 1.974132  | -0.671528 |
| H | 1.508230  | 5.658063  | -1.001888 |
| H | -1.526437 | 2.634857  | -1.454785 |
| H | -0.840649 | 5.005887  | -1.667131 |
| H | 3.054170  | 3.867828  | -0.210525 |
| C | 2.388695  | 1.183100  | 0.022698  |
| C | 3.531364  | 1.200520  | 0.814829  |
| C | 2.388698  | -1.183109 | 0.022713  |
| C | 4.150912  | 0.000004  | 1.201491  |
| H | 3.929757  | 2.149102  | 1.164569  |
| C | 1.569447  | -2.316706 | -0.356123 |
| C | 2.022736  | -3.640361 | -0.458932 |
| C | 1.167277  | -4.631431 | -0.912337 |
| H | 3.054189  | -3.867832 | -0.210510 |
| C | -0.529661 | -2.948364 | -1.164107 |
| H | 1.508226  | -5.658090 | -1.001783 |
| H | -1.526488 | -2.634914 | -1.454567 |
| C | 3.531373  | -1.200516 | 0.814837  |
| C | -0.137898 | -4.270546 | -1.290154 |
| N | 1.873870  | -0.000011 | -0.461450 |
| N | 0.268936  | -1.974163 | -0.671437 |
| H | 3.929775  | -2.149091 | 1.164586  |
| H | -0.840697 | -5.005949 | -1.666900 |
| C | 5.366660  | 0.000006  | 2.094659  |
| H | 5.092363  | 0.001099  | 3.158297  |
| H | 5.987002  | -0.885409 | 1.922746  |
| H | 5.988187  | 0.884309  | 1.921258  |
| C | -2.298512 | -0.000058 | 0.373957  |
| C | -2.477749 | 1.212410  | 1.045568  |
| C | -2.683808 | 1.198937  | 2.423909  |
| C | -2.779316 | 0.000019  | 3.144235  |
| C | -2.683981 | -1.198870 | 2.423977  |
| C | -2.477928 | -1.212433 | 1.045571  |
| H | -2.429508 | 2.156628  | 0.518642  |
| H | -2.784687 | 2.148276  | 2.945020  |
| H | -2.784966 | -2.148168 | 2.945129  |
| H | -2.429805 | -2.156696 | 0.518712  |
| C | -2.980519 | 0.000243  | 4.640088  |
| H | -2.020069 | 0.006832  | 5.171779  |
| H | -3.538111 | 0.882408  | 4.969842  |
| H | -3.527078 | -0.888106 | 4.971570  |

|    |           |           |           |
|----|-----------|-----------|-----------|
| Br | -2.670638 | -0.000030 | -1.712000 |
| Ni | -0.006138 | -0.000010 | -0.727900 |

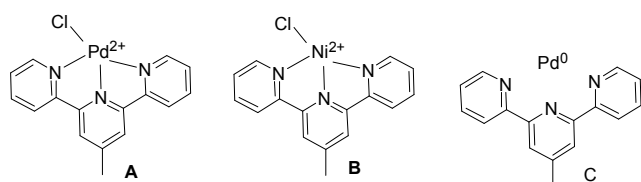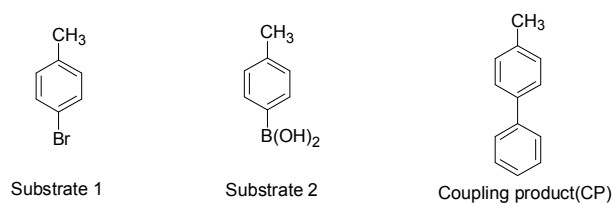

Figure S9 Absorption of active sites on the surface for different substrates and coupling product(CP)

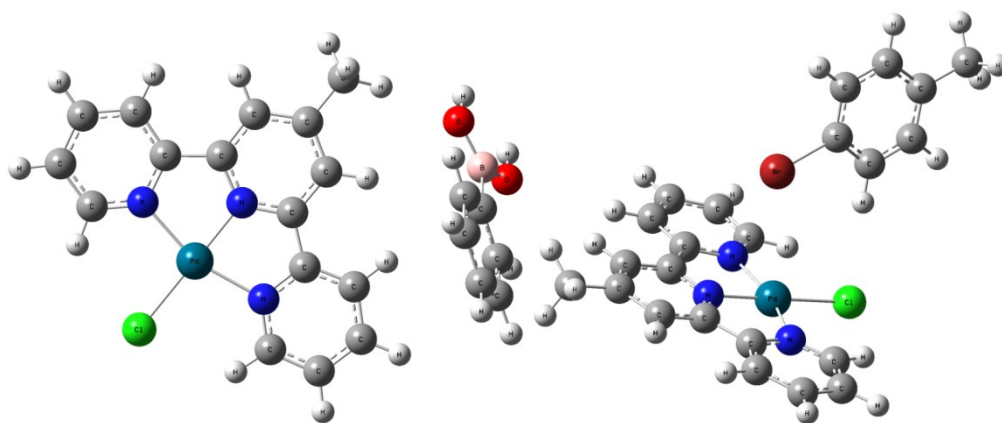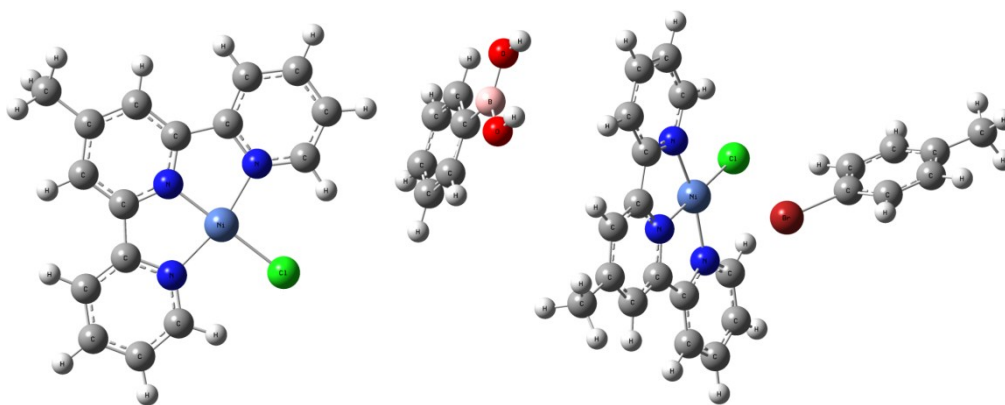

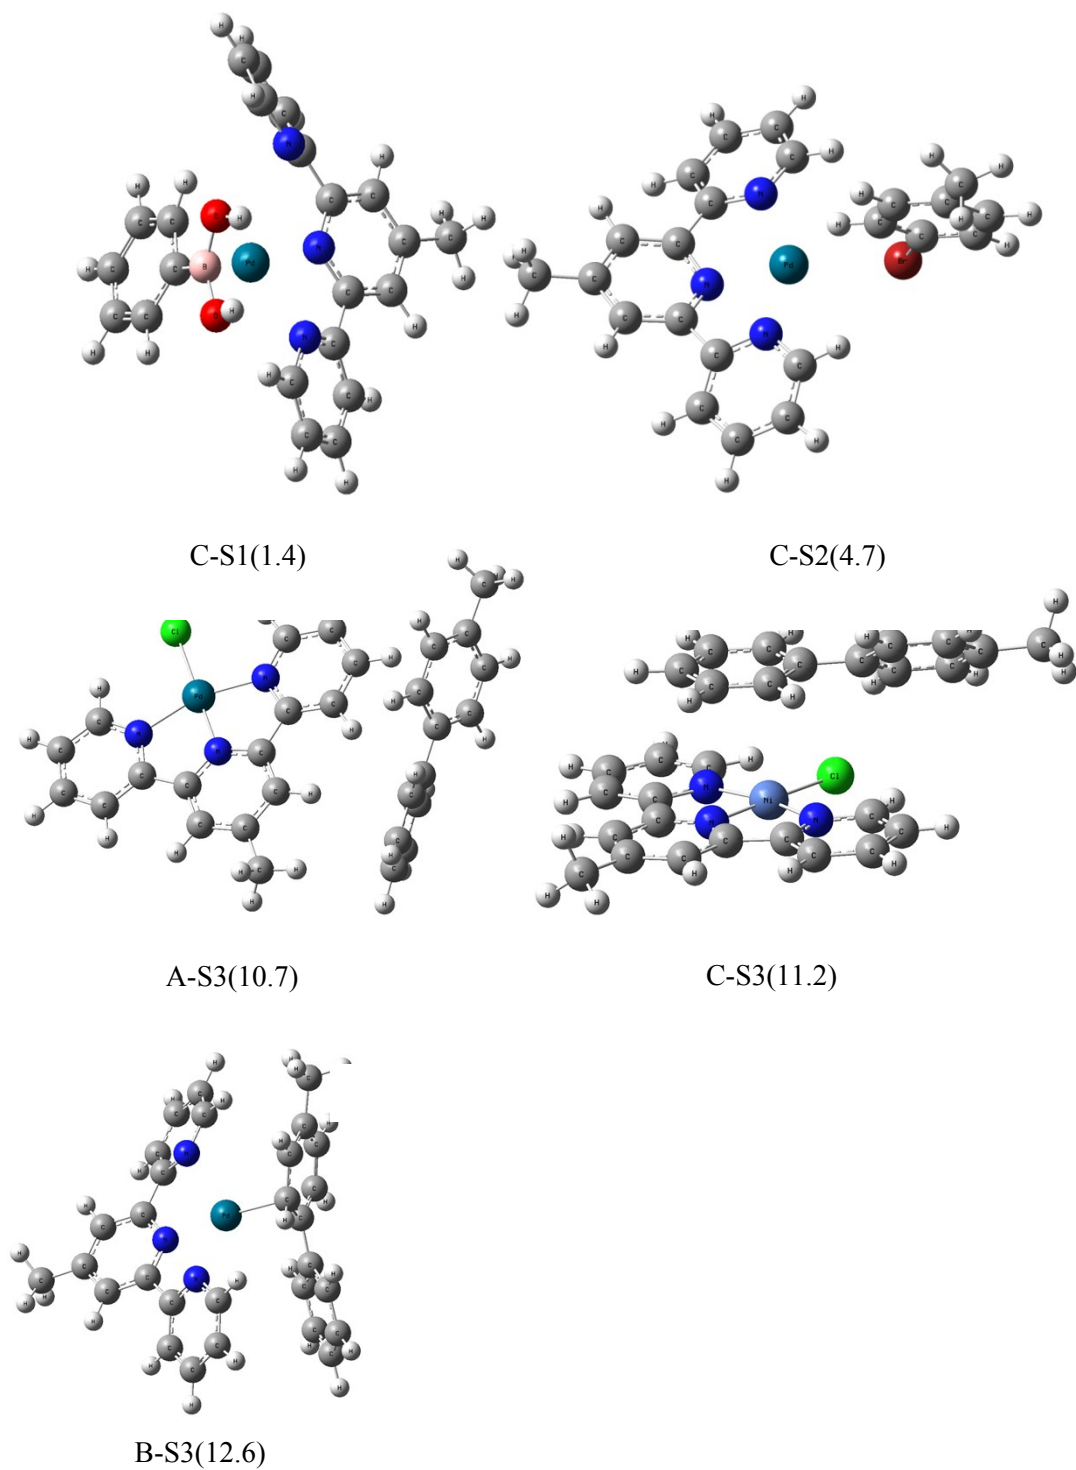

Figure S10 Calculated BE for different active sites with different substrates

### Computational Methods:

The DFT calculations were performed using the Gaussian 09 program[1]. The geometries were fully optimized using B3LYP method[2, 3]. Basis set 6-31G(d, p)



was employed for H, C, N, O, B and Cl atoms, while LANL2DZ was used for Pd, Ni and Br atoms.[4] Then, frequency calculations at the same level of theory were carried out to identify all of the stationary points as minima (zero imaginary frequency) and to provide corrections for free energies.

## References

- [1]G.W. Trucks, M.J. Frisch, H.B. Schlegel, G.E. Scuseria, M.A. Robb, J.R. Cheeseman, G. Scalmani, V. Barone, B. Mennucci, G.A. Petersson, H. Nakatsuji, M. Caricato, X. Li, H.P. Hratchian, A.F. Izmaylov, J. Bloino, G. Zheng, J.L. Sonnenberg, M. Hada, M. Ehara, K. Toyota, R. Fukuda, J. Hasegawa, M. Ishida, T. Nakajima, Y. Honda, O. Kitao, H. Nakai, T. Vreven, J.A. Montgomery, Jr, J.E. Peralta, F. Ogliaro, M. Bearpark, J.J. Heyd, E. Brothers, K.N. Kudin, V.N. Staroverov, T. Keith, R. Kobayashi, J. Normand, K. Raghavachari, A. Rendell, J.C. Burant, S.S. Iyengar, J. Tomasi, M. Cossi, N. Rega, J.M. Millam, M. Klene, J.E. Knox, J.B. Cross, V. Bakken, C. Adamo, J. Jaramillo, R. Gomperts, R.E. Stratmann, O. Yazyev, A.J. Austin, R. Cammi, C. Pomelli, J.W. Ochterski, R.L. Martin, K. Morokuma, V.G. Zakrzewski, G.A. Voth, P. Salvador, J.J. Dannenberg, S. Dapprich, A.D. Daniels, O. Farkas, J.B. Foresman, J.V. Ortiz, J. Cioslowski, D.J. Fox , Revision C.01, (2010).
- [2] A.D. Becke, J. Chem. Phys., 1993, 98, 5648.
- [3] C.T. Lee, W.T. Yang, R.G. Parr, Phys. Rev. B., 1988, 37,785.
- [4]P. J. Hay, W. R. Wadt, J. Chem. Phys. 1985, 82, 299.

## Geometrical Coordinates and Vibrational Frequencies of the Listed Compounds

### j1-1 (A)

Zero-point correction=0.260183

Thermal correction to Energy=0.277867

Thermal correction to Enthalpy=0.278811

Thermal correction to Gibbs Free Energy=0.213368

Sum of electronic and zero-point Energies= -1368.385062

Sum of electronic and thermal Energies= -1368.367378

Sum of electronic and thermal Enthalpies= -1368.366434

Sum of electronic and thermal Free Energies= -1368.431877

Cartesian coordinates

|   |           |           |           |
|---|-----------|-----------|-----------|
| C | -3.679003 | 1.024162  | -0.002937 |
| C | -2.349189 | 0.613609  | -0.001766 |
| C | -3.006233 | -1.644323 | 0.001272  |
| C | -4.355383 | -1.286145 | -0.000086 |
| C | -4.693332 | 0.063406  | -0.002209 |

|    |           |           |           |
|----|-----------|-----------|-----------|
| H  | -3.925980 | 2.079418  | -0.004284 |
| H  | -2.671414 | -2.676380 | 0.002911  |
| H  | -5.113514 | -2.060904 | 0.000582  |
| H  | -5.733252 | 0.373059  | -0.003198 |
| C  | -1.189430 | 1.538061  | -0.002118 |
| C  | -1.209153 | 2.932481  | -0.009002 |
| C  | 1.189663  | 1.537917  | -0.002083 |
| C  | 0.000234  | 3.647290  | -0.009344 |
| H  | -2.149728 | 3.471604  | -0.015925 |
| C  | 1.209603  | 2.932242  | -0.008946 |
| H  | 2.150271  | 3.471235  | -0.015825 |
| C  | 2.349256  | 0.613241  | -0.001739 |
| C  | 3.679143  | 1.023558  | -0.002920 |
| C  | 4.693305  | 0.062628  | -0.002221 |
| H  | 3.926310  | 2.078771  | -0.004257 |
| C  | 3.005917  | -1.644804 | 0.001255  |
| C  | 4.355126  | -1.286866 | -0.000116 |
| H  | 5.733278  | 0.372102  | -0.003221 |
| H  | 2.670913  | -2.676800 | 0.002879  |
| H  | 5.113125  | -2.061754 | 0.000526  |
| N  | -2.037094 | -0.720914 | 0.000517  |
| N  | 0.000033  | 0.906410  | 0.001462  |
| N  | 2.036937  | -0.721223 | 0.000526  |
| Pd | -0.000098 | -1.070519 | 0.001592  |
| Cl | -0.000314 | -3.393307 | 0.001379  |
| C  | 0.000694  | 5.152754  | 0.014286  |
| H  | -0.891235 | 5.560944  | -0.466732 |
| H  | 0.012056  | 5.513281  | 1.049962  |
| H  | 0.882586  | 5.560352  | -0.485570 |

### **j1-Ni (B)**

Zero-point correction= 0.261298

Thermal correction to Energy=0.278589

Thermal correction to Enthalpy=0.279533

Thermal correction to Gibbs Free Energy= 0.215383

Sum of electronic and zero-point Energies= -1410.977430

Sum of electronic and thermal Energies= -1410.960139

Sum of electronic and thermal Enthalpies= -1410.959195

Sum of electronic and thermal Free Energies= -1411.023344

Cartesian coordinates

|   |           |          |           |
|---|-----------|----------|-----------|
| C | -3.656565 | 0.829607 | -0.003309 |
| C | -2.313798 | 0.470077 | -0.002132 |

|    |           |           |           |
|----|-----------|-----------|-----------|
| C  | -2.861460 | -1.804230 | 0.001929  |
| C  | -4.225274 | -1.505698 | 0.000705  |
| C  | -4.627784 | -0.174419 | -0.001985 |
| H  | -3.944100 | 1.874683  | -0.005165 |
| H  | -2.486508 | -2.821057 | 0.003938  |
| H  | -4.946100 | -2.315240 | 0.001888  |
| H  | -5.680987 | 0.086657  | -0.002949 |
| C  | -1.180804 | 1.415193  | -0.002751 |
| C  | -1.208302 | 2.808208  | -0.008858 |
| C  | 1.180983  | 1.415086  | -0.002721 |
| C  | 0.000173  | 3.525054  | -0.008888 |
| H  | -2.151899 | 3.342172  | -0.015421 |
| C  | 1.208654  | 2.808009  | -0.008809 |
| H  | 2.152327  | 3.341868  | -0.015334 |
| C  | 2.313829  | 0.469777  | -0.002108 |
| C  | 3.656654  | 0.829093  | -0.003293 |
| C  | 4.627716  | -0.175081 | -0.001995 |
| H  | 3.944354  | 1.874125  | -0.005139 |
| C  | 2.861149  | -1.804618 | 0.001912  |
| C  | 4.225003  | -1.506301 | 0.000678  |
| H  | 5.680960  | 0.085833  | -0.002970 |
| H  | 2.486035  | -2.821384 | 0.003908  |
| H  | 4.945705  | -2.315954 | 0.001838  |
| N  | -1.927892 | -0.842089 | 0.000605  |
| N  | 0.000017  | 0.773762  | 0.000279  |
| N  | 1.927727  | -0.842327 | 0.000611  |
| Cl | -0.000236 | -3.265154 | 0.002731  |
| C  | 0.000604  | 5.029867  | 0.015356  |
| H  | -0.891652 | 5.438525  | -0.464669 |
| H  | 0.012055  | 5.389115  | 1.051542  |
| H  | 0.882772  | 5.437957  | -0.483625 |
| Ni | -0.000092 | -1.089031 | 0.001174  |

### **j3-1(C)**

Zero-point correction=0.254194

Thermal correction to Energy= 0.270111

Thermal correction to Enthalpy= 0.271055

Thermal correction to Gibbs Free Energy= 0.209988

Sum of electronic and zero-point Energies= -908.300142

Sum of electronic and thermal Energies= -908.284225

Sum of electronic and thermal Enthalpies= -908.283281

Sum of electronic and thermal Free Energies= -908.344348

Cartesian coordinates

|    |           |           |           |
|----|-----------|-----------|-----------|
| C  | -3.622132 | 0.726053  | 0.633414  |
| C  | -2.350942 | 0.299024  | 0.228235  |
| C  | -3.182800 | -1.831372 | -0.218980 |
| C  | -4.465995 | -1.471543 | 0.175277  |
| C  | -4.692723 | -0.159732 | 0.604544  |
| H  | -3.751828 | 1.741068  | 0.994277  |
| H  | -2.970791 | -2.832796 | -0.579479 |
| H  | -5.268948 | -2.199838 | 0.131586  |
| H  | -5.680371 | 0.158338  | 0.924229  |
| C  | -1.170867 | 1.183573  | 0.225896  |
| C  | -1.198864 | 2.530482  | -0.134879 |
| C  | 1.170863  | 1.183562  | 0.225836  |
| C  | 0.000007  | 3.245570  | -0.281724 |
| H  | -2.147573 | 3.016107  | -0.345946 |
| C  | 1.198958  | 2.530368  | -0.134922 |
| H  | 2.147705  | 3.015906  | -0.346066 |
| C  | 2.350932  | 0.298922  | 0.228191  |
| C  | 3.622088  | 0.725888  | 0.633487  |
| C  | 4.692652  | -0.159951 | 0.604668  |
| H  | 3.751800  | 1.740890  | 0.994378  |
| C  | 3.182716  | -1.831468 | -0.219082 |
| C  | 4.465900  | -1.471712 | 0.175302  |
| H  | 5.680286  | 0.158060  | 0.924451  |
| H  | 2.970693  | -2.832860 | -0.579656 |
| H  | 5.268819  | -2.200046 | 0.131650  |
| N  | -2.135142 | -0.983787 | -0.213052 |
| N  | -0.000025 | 0.544123  | 0.500337  |
| N  | 2.135090  | -0.983846 | -0.213128 |
| Pd | -0.000032 | -1.481272 | -0.285763 |
| C  | 0.000317  | 4.709302  | -0.646901 |
| H  | -0.889757 | 4.979714  | -1.223033 |
| H  | 0.011396  | 5.341749  | 0.250566  |
| H  | 0.879934  | 4.974970  | -1.241149 |

**s-1 (s1)**

Zero-point correction= 0.125091

Thermal correction to Energy= 0.132994

Thermal correction to Enthalpy= 0.133938

Thermal correction to Gibbs Free Energy= 0.092241

Sum of electronic and zero-point Energies= -408.153798

Sum of electronic and thermal Energies=-408.145895

Sum of electronic and thermal Enthalpies= -408.144951  
Sum of electronic and thermal Free Energies= -408.186648

Cartesian coordinates

|   |           |           |           |
|---|-----------|-----------|-----------|
| C | 2.644913  | 0.000052  | 0.000003  |
| C | 1.945414  | 1.208910  | -0.000026 |
| C | 0.551142  | 1.205125  | -0.000008 |
| C | -0.173255 | -0.000115 | -0.000004 |
| C | 0.551242  | -1.205203 | 0.000002  |
| C | 1.945550  | -1.208850 | 0.000018  |
| H | 3.731640  | 0.000114  | 0.000010  |
| H | 2.487631  | 2.150539  | -0.000065 |
| H | 0.009158  | 2.146405  | 0.000005  |
| H | 0.009421  | -2.146586 | -0.000035 |
| H | 2.487816  | -2.150449 | 0.000046  |
| B | -1.735754 | -0.000006 | 0.000011  |
| O | -2.383914 | 1.212150  | 0.000053  |
| H | -3.346409 | 1.162515  | -0.000158 |
| O | -2.384079 | -1.212089 | 0.000004  |
| H | -3.346573 | -1.162504 | -0.000217 |

**s-2 (S2)**

Zero-point correction= 0.117774  
Thermal correction to Energy= 0.125429  
Thermal correction to Enthalpy= 0.126374  
Thermal correction to Gibbs Free Energy= 0.083865  
Sum of electronic and zero-point Energies= -284.012700  
Sum of electronic and thermal Energies= -284.005044  
Sum of electronic and thermal Enthalpies= -284.004100  
Sum of electronic and thermal Free Energies= -284.046608

Cartesian coordinates

|   |           |           |           |
|---|-----------|-----------|-----------|
| C | 0.312316  | -0.000033 | -0.000471 |
| C | -0.366751 | 1.213842  | -0.004435 |
| C | -1.762742 | 1.201116  | -0.010294 |
| C | -2.483896 | -0.000027 | -0.010151 |
| C | -1.762764 | -1.201143 | -0.010306 |
| C | -0.366737 | -1.213875 | -0.004424 |
| H | 0.177645  | 2.151398  | -0.006843 |
| H | -2.297185 | 2.147825  | -0.017095 |
| H | -2.297178 | -2.147867 | -0.017109 |
| H | 0.177614  | -2.151457 | -0.006822 |
| C | -3.994214 | 0.000038  | 0.015561  |

|    |           |           |           |
|----|-----------|-----------|-----------|
| H  | -4.372214 | 0.001290  | 1.045746  |
| H  | -4.403386 | 0.884838  | -0.481378 |
| H  | -4.403432 | -0.885912 | -0.479274 |
| Br | 2.284768  | 0.000011  | 0.003140  |

### **s-3 (S3)**

Zero-point correction= 0.209051

Thermal correction to Energy= 0.219888

Thermal correction to Enthalpy= 0.220832

Thermal correction to Gibbs Free Energy= 0.170321

Sum of electronic and zero-point Energies= -502.433576

Sum of electronic and thermal Energies= -502.422739

Sum of electronic and thermal Enthalpies= -502.421795

Sum of electronic and thermal Free Energies= -502.472306

#### Cartesian coordinates

|   |           |           |           |
|---|-----------|-----------|-----------|
| C | -0.268204 | 0.000972  | -0.001512 |
| C | -0.995983 | 1.137515  | 0.386685  |
| C | -2.388678 | 1.136729  | 0.380889  |
| C | -3.113346 | 0.003188  | -0.008685 |
| C | -2.388438 | -1.129982 | -0.399254 |
| C | -0.995785 | -1.133763 | -0.395664 |
| C | 1.216733  | 0.000240  | 0.000091  |
| C | 1.941421  | 1.139659  | -0.389049 |
| C | 3.335246  | 1.139279  | -0.386056 |
| C | 4.037765  | -0.002019 | 0.004017  |
| C | 3.332349  | -1.142234 | 0.392075  |
| C | 1.938542  | -1.140387 | 0.391107  |
| H | -0.464477 | 2.024826  | 0.717823  |
| H | -2.923075 | 2.031199  | 0.691939  |
| H | -2.922583 | -2.020501 | -0.721932 |
| H | -0.463901 | -2.018863 | -0.732065 |
| H | 1.405514  | 2.023847  | -0.721061 |
| H | 3.873515  | 2.029736  | -0.698365 |
| H | 5.123780  | -0.002887 | 0.005501  |
| H | 3.868329  | -2.033583 | 0.705771  |
| H | 1.400200  | -2.023788 | 0.721317  |
| C | -4.623146 | -0.005761 | 0.016375  |
| H | -5.032290 | -0.678202 | -0.743648 |
| H | -5.002853 | -0.345733 | 0.988259  |
| H | -5.033024 | 0.993327  | -0.159647 |

### **a+s1-3 (a-s1)**

Zero-point correction= 0.386469  
Thermal correction to Energy= 0.414100  
Thermal correction to Enthalpy= 0.415044  
Thermal correction to Gibbs Free Energy= 0.324048  
Sum of electronic and zero-point Energies= -1776.543830  
Sum of electronic and thermal Energies= -1776.516200  
Sum of electronic and thermal Enthalpies= -1776.515255  
Sum of electronic and thermal Free Energies= -1776.606252

Cartesian coordinates

|    |           |           |           |
|----|-----------|-----------|-----------|
| C  | 1.799225  | -1.611197 | -0.072362 |
| C  | 0.504770  | -1.100387 | -0.056391 |
| C  | -0.399253 | -3.258513 | -0.291792 |
| C  | 0.876828  | -3.823861 | -0.316304 |
| C  | 1.984625  | -2.989959 | -0.204116 |
| H  | 2.656433  | -0.953998 | 0.017463  |
| H  | -1.306568 | -3.847800 | -0.372557 |
| H  | 0.982100  | -4.897796 | -0.420174 |
| H  | 2.991885  | -3.392106 | -0.214852 |
| C  | 0.180332  | 0.339978  | 0.075799  |
| C  | 1.072589  | 1.406433  | 0.190713  |
| C  | -1.672328 | 1.828405  | 0.181767  |
| C  | 0.577161  | 2.715566  | 0.310163  |
| H  | 2.143205  | 1.235277  | 0.190368  |
| C  | -0.813623 | 2.919672  | 0.301314  |
| H  | -1.208175 | 3.925990  | 0.386758  |
| C  | -3.155092 | 1.838420  | 0.150113  |
| C  | -3.934060 | 2.988258  | 0.246163  |
| C  | -5.325814 | 2.879181  | 0.203290  |
| H  | -3.464506 | 3.959083  | 0.353490  |
| C  | -5.082189 | 0.502382  | -0.025670 |
| C  | -5.908591 | 1.623076  | 0.065494  |
| H  | -5.942063 | 3.769200  | 0.277362  |
| H  | -5.467035 | -0.506296 | -0.134151 |
| H  | -6.984693 | 1.498087  | 0.028246  |
| N  | -0.575538 | -1.937888 | -0.165039 |
| N  | -1.142374 | 0.594489  | 0.075288  |
| N  | -3.748345 | 0.610912  | 0.016103  |
| Pd | -2.380127 | -0.935949 | -0.104349 |
| Cl | -3.840825 | -2.733855 | -0.314514 |
| C  | 1.521667  | 3.877283  | 0.467345  |
| H  | 2.508467  | 3.643959  | 0.060913  |
| H  | 1.132725  | 4.773851  | -0.023175 |
| H  | 1.646114  | 4.117263  | 1.530565  |

|   |          |           |           |
|---|----------|-----------|-----------|
| C | 5.135093 | -1.509915 | 1.937926  |
| C | 4.709077 | -0.208352 | 2.214749  |
| C | 4.713390 | 0.754057  | 1.202706  |
| C | 5.135451 | 0.440196  | -0.103811 |
| C | 5.564648 | -0.876790 | -0.358472 |
| C | 5.565827 | -1.842859 | 0.649449  |
| H | 5.147204 | -2.257139 | 2.726355  |
| H | 4.393394 | 0.057573  | 3.219582  |
| H | 4.411754 | 1.773049  | 1.431165  |
| H | 5.915877 | -1.133567 | -1.353580 |
| H | 5.922270 | -2.847668 | 0.439031  |
| B | 5.175387 | 1.524042  | -1.233522 |
| O | 4.545671 | 2.728754  | -0.996402 |
| H | 4.669686 | 3.392590  | -1.685422 |
| O | 5.815459 | 1.208241  | -2.397565 |
| H | 5.831228 | 1.884415  | -3.084151 |

### **a+s2-111 (a-s2)**

Zero-point correction= 0.378291

Thermal correction to Energy= 0.406223

Thermal correction to Enthalpy= 0.407167

Thermal correction to Gibbs Free Energy= 0.310751

Sum of electronic and zero-point Energies= -1652.404915

Sum of electronic and thermal Energies= -1652.376982

Sum of electronic and thermal Enthalpies= -1652.376038

Sum of electronic and thermal Free Energies= -1652.472454

### Cartesian coordinates

|    |          |           |           |
|----|----------|-----------|-----------|
| C  | 3.168141 | 0.121243  | -1.385993 |
| C  | 3.404263 | 0.578294  | -0.095876 |
| C  | 4.731545 | 0.732240  | 0.313502  |
| C  | 5.803297 | 0.442076  | -0.540999 |
| C  | 5.512425 | -0.018413 | -1.832440 |
| C  | 4.196481 | -0.182414 | -2.269397 |
| H  | 2.591046 | 0.809513  | 0.583397  |
| H  | 4.928789 | 1.087435  | 1.321586  |
| H  | 6.324952 | -0.254898 | -2.514361 |
| H  | 3.986061 | -0.538936 | -3.271134 |
| C  | 7.231331 | 0.645035  | -0.094050 |
| H  | 7.590052 | 1.644619  | -0.368312 |
| H  | 7.328877 | 0.550578  | 0.991018  |
| H  | 7.904266 | -0.080151 | -0.560569 |
| Br | 1.294278 | -0.112223 | -2.004313 |



|    |           |           |           |
|----|-----------|-----------|-----------|
| C  | -3.214855 | 3.026755  | -0.876044 |
| C  | -2.576205 | 1.922066  | -0.319882 |
| C  | -1.316897 | 3.313440  | 1.095215  |
| C  | -1.926621 | 4.454353  | 0.571557  |
| C  | -2.886110 | 4.307224  | -0.425278 |
| H  | -3.959526 | 2.894673  | -1.652219 |
| H  | -0.560742 | 3.355124  | 1.872041  |
| H  | -1.644434 | 5.431201  | 0.947233  |
| H  | -3.377351 | 5.175340  | -0.852290 |
| C  | -2.837428 | 0.518352  | -0.719116 |
| C  | -3.721029 | 0.060476  | -1.696158 |
| C  | -2.155087 | -1.709340 | -0.243384 |
| C  | -3.827393 | -1.316659 | -1.950125 |
| H  | -4.323471 | 0.758552  | -2.266221 |
| C  | -3.026986 | -2.204471 | -1.212186 |
| H  | -3.089008 | -3.269361 | -1.405722 |
| C  | -1.229396 | -2.479640 | 0.621222  |
| C  | -1.103920 | -3.865518 | 0.594243  |
| C  | -0.194714 | -4.488042 | 1.452358  |
| H  | -1.704655 | -4.456207 | -0.087379 |
| C  | 0.402163  | -2.325316 | 2.305584  |
| C  | 0.567808  | -3.711014 | 2.318716  |
| H  | -0.088042 | -5.567730 | 1.438878  |
| H  | 0.964134  | -1.659641 | 2.952049  |
| H  | 1.284061  | -4.157206 | 2.999048  |
| N  | -1.634810 | 2.087875  | 0.660987  |
| N  | -2.102959 | -0.379744 | -0.035849 |
| N  | -0.470194 | -1.732475 | 1.481896  |
| Pd | -0.824249 | 0.298054  | 1.308828  |
| Cl | 0.696959  | 1.098233  | 2.882515  |
| C  | -4.795157 | -1.835223 | -2.980255 |
| H  | -4.994371 | -1.090389 | -3.754108 |
| H  | -4.419022 | -2.742097 | -3.460089 |
| H  | -5.752391 | -2.085656 | -2.507247 |

### **b+s1-22 (b-s1)**

|                                            |              |
|--------------------------------------------|--------------|
| Zero-point correction=                     | 0.386979     |
| Thermal correction to Energy=              | 0.414599     |
| Thermal correction to Enthalpy=            | 0.415543     |
| Thermal correction to Gibbs Free Energy=   | 0.321262     |
| Sum of electronic and zero-point Energies= | -1819.131773 |
| Sum of electronic and thermal Energies=    | -1819.104153 |

Sum of electronic and thermal Enthalpies= -1819.103209  
Sum of electronic and thermal Free Energies= -1819.197490

Cartesian coordinates

|    |           |           |           |
|----|-----------|-----------|-----------|
| C  | -5.574553 | -1.202630 | 0.255990  |
| C  | -4.260041 | -0.758108 | 0.168415  |
| C  | -3.452778 | -2.952687 | 0.201902  |
| C  | -4.750212 | -3.459887 | 0.291351  |
| C  | -5.823579 | -2.575506 | 0.318656  |
| H  | -6.392787 | -0.491986 | 0.274921  |
| H  | -2.576655 | -3.590243 | 0.175959  |
| H  | -4.899191 | -4.532578 | 0.337616  |
| H  | -6.842609 | -2.941977 | 0.387376  |
| C  | -3.845072 | 0.655866  | 0.095010  |
| C  | -4.641834 | 1.798259  | 0.101257  |
| C  | -1.884376 | 1.964599  | -0.057244 |
| C  | -4.036764 | 3.064423  | 0.022568  |
| H  | -5.721109 | 1.718994  | 0.167714  |
| C  | -2.636486 | 3.138361  | -0.054923 |
| H  | -2.149077 | 4.105288  | -0.110352 |
| C  | -0.420359 | 1.806966  | -0.128420 |
| C  | 0.493374  | 2.849968  | -0.215677 |
| C  | 1.857822  | 2.553411  | -0.276754 |
| H  | 0.149490  | 3.877826  | -0.236808 |
| C  | 1.298528  | 0.220940  | -0.159011 |
| C  | 2.266631  | 1.224887  | -0.248446 |
| H  | 2.586453  | 3.354523  | -0.346838 |
| H  | 1.563655  | -0.828619 | -0.135491 |
| H  | 3.313438  | 0.946292  | -0.295667 |
| N  | -3.211530 | -1.635264 | 0.141945  |
| N  | -2.508803 | 0.776995  | 0.016851  |
| N  | -0.010994 | 0.501106  | -0.101454 |
| Cl | -0.269390 | -2.586018 | 0.013250  |
| C  | -4.874928 | 4.314359  | -0.002800 |
| H  | -5.136890 | 4.571433  | -1.036334 |
| H  | -5.808327 | 4.181526  | 0.549383  |
| H  | -4.337525 | 5.165634  | 0.421625  |
| Ni | -1.472406 | -0.770880 | 0.018496  |
| C  | 4.362380  | -1.324366 | -2.130682 |
| C  | 5.171305  | -0.193658 | -2.276056 |
| C  | 5.861211  | 0.315279  | -1.173742 |
| C  | 5.757652  | -0.289137 | 0.093658  |
| C  | 4.936129  | -1.425729 | 0.217619  |
| C  | 4.245584  | -1.942127 | -0.881060 |

|   |          |           |           |
|---|----------|-----------|-----------|
| H | 3.835294 | -1.731193 | -2.989436 |
| H | 5.273256 | 0.280155  | -3.248555 |
| H | 6.501959 | 1.184579  | -1.292044 |
| H | 4.854630 | -1.914128 | 1.184453  |
| H | 3.629788 | -2.830568 | -0.769385 |
| B | 6.561338 | 0.264763  | 1.320701  |
| O | 7.327162 | 1.385595  | 1.126732  |
| H | 7.840501 | 1.678387  | 1.888098  |
| O | 6.443518 | -0.401262 | 2.512686  |
| H | 6.972047 | -0.055630 | 3.240707  |

### **b+s2-333 (b-s2)**

Zero-point correction= 0.379339

Thermal correction to Energy= 0.406910

Thermal correction to Enthalpy= 0.407854

Thermal correction to Gibbs Free Energy= 0.312681

Sum of electronic and zero-point Energies= -1694.998161

Sum of electronic and thermal Energies= -1694.970589

Sum of electronic and thermal Enthalpies= -1694.969645

Sum of electronic and thermal Free Energies= -1695.064818

#### Cartesian coordinates

|    |           |           |           |
|----|-----------|-----------|-----------|
| C  | 3.126610  | -0.003806 | -1.210623 |
| C  | 3.471052  | -0.004704 | 0.134457  |
| C  | 4.829586  | -0.008909 | 0.462182  |
| C  | 5.824768  | -0.010209 | -0.524101 |
| C  | 5.423959  | -0.013155 | -1.867223 |
| C  | 4.074530  | -0.008993 | -2.225840 |
| H  | 2.715739  | -0.005792 | 0.912907  |
| H  | 5.113473  | -0.013033 | 1.511327  |
| H  | 6.175177  | -0.020710 | -2.652525 |
| H  | 3.778201  | -0.013463 | -3.268450 |
| C  | 7.288142  | 0.015937  | -0.152771 |
| H  | 7.665075  | 1.045289  | -0.114506 |
| H  | 7.460198  | -0.430791 | 0.830348  |
| H  | 7.896350  | -0.525184 | -0.883222 |
| Br | 1.204316  | -0.002777 | -1.715968 |
| C  | -2.216814 | -3.653998 | -0.055855 |
| C  | -1.970105 | -2.311943 | 0.210443  |
| C  | -0.405287 | -2.863878 | 1.857085  |
| C  | -0.609138 | -4.226971 | 1.635744  |
| C  | -1.524695 | -4.627218 | 0.668144  |

|    |           |           |           |
|----|-----------|-----------|-----------|
| H  | -2.935714 | -3.938282 | -0.815578 |
| H  | 0.294129  | -2.491159 | 2.596086  |
| H  | -0.051345 | -4.949461 | 2.220417  |
| H  | -1.702596 | -5.679965 | 0.474598  |
| C  | -2.622014 | -1.177999 | -0.471249 |
| C  | -3.576199 | -1.204657 | -1.486377 |
| C  | -2.619032 | 1.183055  | -0.471823 |
| C  | -4.067886 | 0.003960  | -2.006687 |
| H  | -3.938060 | -2.148130 | -1.879229 |
| C  | -3.572964 | 1.211730  | -1.486870 |
| H  | -3.932359 | 2.155981  | -1.880205 |
| C  | -1.964194 | 2.315564  | 0.209498  |
| C  | -2.207425 | 3.658158  | -0.057341 |
| C  | -1.512901 | 4.629866  | 0.666352  |
| H  | -2.925516 | 3.943988  | -0.817250 |
| C  | -0.398130 | 2.864134  | 1.856086  |
| C  | -0.598478 | 4.227641  | 1.634226  |
| H  | -1.688076 | 5.682994  | 0.472393  |
| H  | 0.300248  | 2.489874  | 2.595292  |
| H  | -0.038932 | 4.948935  | 2.218702  |
| N  | -1.067867 | -1.928522 | 1.162829  |
| N  | -2.183110 | 0.001999  | -0.002448 |
| N  | -1.063038 | 1.930204  | 1.162093  |
| Cl | 0.618629  | -0.000935 | 2.919890  |
| C  | -5.119909 | 0.005869  | -3.083035 |
| H  | -5.060966 | -0.892079 | -3.702509 |
| H  | -6.119703 | 0.031875  | -2.632869 |
| H  | -5.028262 | 0.881541  | -3.730124 |
| Ni | -0.884557 | 0.000645  | 1.332189  |

### **c+s1-11 (c-s1)**

Zero-point correction= 0.379706

Thermal correction to Energy= 0.406692

Thermal correction to Enthalpy= 0.407636

Thermal correction to Gibbs Free Energy= 0.319104

Sum of electronic and zero-point Energies= -1316.468127

Sum of electronic and thermal Energies= -1316.441141

Sum of electronic and thermal Enthalpies= -1316.440196

Sum of electronic and thermal Free Energies= -1316.528729

Cartesian coordinates

|   |          |          |           |
|---|----------|----------|-----------|
| C | 2.900434 | 2.821159 | -0.591578 |
| C | 2.226346 | 1.860594 | 0.175644  |

|    |           |           |           |
|----|-----------|-----------|-----------|
| C  | 0.997465  | 3.479282  | 1.244568  |
| C  | 1.612170  | 4.507778  | 0.526824  |
| C  | 2.583291  | 4.166448  | -0.413050 |
| H  | 3.636833  | 2.516722  | -1.328300 |
| H  | 0.231803  | 3.701149  | 1.985310  |
| H  | 1.332786  | 5.542005  | 0.701185  |
| H  | 3.079950  | 4.931422  | -1.002937 |
| C  | 2.537288  | 0.408715  | 0.039026  |
| C  | 3.864826  | -0.021550 | -0.040713 |
| C  | 1.762414  | -1.773230 | -0.034323 |
| C  | 4.154975  | -1.388237 | -0.102290 |
| H  | 4.668302  | 0.708389  | -0.021614 |
| C  | 3.073120  | -2.267991 | -0.085140 |
| H  | 3.251542  | -3.337878 | -0.086886 |
| C  | 0.588589  | -2.685907 | -0.008624 |
| C  | 0.653855  | -4.005632 | -0.478175 |
| C  | -0.470719 | -4.819497 | -0.380850 |
| H  | 1.562412  | -4.382985 | -0.934206 |
| C  | -1.632267 | -2.964944 | 0.598103  |
| C  | -1.635276 | -4.293734 | 0.180824  |
| H  | -0.440080 | -5.842442 | -0.744015 |
| H  | -2.518922 | -2.494277 | 1.014772  |
| H  | -2.533660 | -4.893689 | 0.284075  |
| N  | 1.287721  | 2.185497  | 1.078964  |
| N  | 1.501828  | -0.451778 | 0.018926  |
| N  | -0.552742 | -2.171858 | 0.500604  |
| Pd | -0.778905 | 0.084256  | 0.146853  |
| C  | 5.578519  | -1.885097 | -0.132211 |
| H  | 6.197219  | -1.276327 | -0.798941 |
| H  | 6.030418  | -1.833872 | 0.865712  |
| H  | 5.633388  | -2.924191 | -0.467462 |
| C  | -2.463212 | 1.515165  | -2.892633 |
| C  | -3.359116 | 0.487975  | -2.504688 |
| C  | -3.516518 | 0.165295  | -1.173383 |
| C  | -2.815323 | 0.870641  | -0.137410 |
| C  | -1.897639 | 1.899589  | -0.552313 |
| C  | -1.748033 | 2.205436  | -1.935131 |
| H  | -2.350025 | 1.763761  | -3.944910 |
| H  | -3.929865 | -0.042199 | -3.263307 |
| H  | -4.218196 | -0.612589 | -0.882877 |
| H  | -1.535491 | 2.615075  | 0.180131  |
| H  | -1.078240 | 3.011039  | -2.227200 |
| B  | -3.107552 | 0.625732  | 1.366519  |
| O  | -3.772853 | -0.542574 | 1.732916  |

|   |           |           |          |
|---|-----------|-----------|----------|
| H | -3.977660 | -0.589502 | 2.673350 |
| O | -2.783507 | 1.603944  | 2.291680 |
| H | -2.853033 | 1.318423  | 3.209205 |

### **c+s2-111 (c-s2)**

Zero-point correction= 0.372073

Thermal correction to Energy= 0.399042

Thermal correction to Enthalpy= 0.399986

Thermal correction to Gibbs Free Energy= 0.307070

Sum of electronic and zero-point Energies= -1192.318523

Sum of electronic and thermal Energies= -1192.291554

Sum of electronic and thermal Enthalpies= -1192.290610

Sum of electronic and thermal Free Energies= -1192.383526

#### Cartesian coordinates

|   |           |           |           |
|---|-----------|-----------|-----------|
| C | 3.501575  | -3.152737 | 0.085966  |
| C | 2.653487  | -2.040098 | 0.202167  |
| C | 0.783988  | -3.413828 | 0.063017  |
| C | 1.562454  | -4.558991 | -0.040971 |
| C | 2.956943  | -4.424528 | -0.029924 |
| H | 4.576582  | -3.007044 | 0.060927  |
| H | -0.300730 | -3.475002 | 0.056564  |
| H | 1.088779  | -5.532159 | -0.119928 |
| H | 3.600568  | -5.293770 | -0.126265 |
| C | 3.155853  | -0.665610 | 0.345157  |
| C | 4.315488  | -0.332081 | 1.045003  |
| C | 2.632575  | 1.599381  | 0.048590  |
| C | 4.665261  | 1.012237  | 1.234965  |
| H | 4.932808  | -1.116631 | 1.473819  |
| C | 3.782186  | 1.982124  | 0.739223  |
| H | 3.975733  | 3.035014  | 0.924917  |
| C | 1.589869  | 2.539867  | -0.386729 |
| C | 1.874518  | 3.840853  | -0.829013 |
| C | 0.837759  | 4.681694  | -1.210911 |
| H | 2.906595  | 4.169835  | -0.893724 |
| C | -0.684701 | 2.895753  | -0.713308 |
| C | -0.475484 | 4.196557  | -1.150292 |
| H | 1.043931  | 5.687929  | -1.562987 |
| H | -1.688758 | 2.486491  | -0.645646 |
| H | -1.321059 | 4.817946  | -1.426978 |
| N | 1.291839  | -2.172765 | 0.191552  |
| N | 2.360091  | 0.289728  | -0.212548 |

|    |           |           |           |
|----|-----------|-----------|-----------|
| N  | 0.306107  | 2.065724  | -0.329119 |
| Pd | 0.258280  | -0.203833 | -0.361654 |
| C  | 5.889186  | 1.399644  | 2.027471  |
| H  | 6.671054  | 0.637798  | 1.950093  |
| H  | 6.305554  | 2.349741  | 1.677889  |
| H  | 5.657492  | 1.520124  | 3.093643  |
| C  | -3.510737 | -0.463130 | -0.144553 |
| C  | -4.869968 | -0.585881 | -0.405033 |
| C  | -5.773224 | -0.202530 | 0.588992  |
| C  | -5.333955 | 0.297433  | 1.822126  |
| C  | -3.953380 | 0.399647  | 2.041326  |
| C  | -3.029693 | 0.022506  | 1.064435  |
| H  | -5.222852 | -0.972903 | -1.354747 |
| H  | -6.839135 | -0.297374 | 0.397063  |
| H  | -3.587519 | 0.777930  | 2.992784  |
| H  | -1.955910 | 0.096642  | 1.231316  |
| C  | -6.321382 | 0.738581  | 2.877068  |
| H  | -6.552286 | 1.806983  | 2.781284  |
| H  | -7.266195 | 0.193222  | 2.795019  |
| H  | -5.926121 | 0.581832  | 3.885160  |
| Br | -2.205068 | -0.999151 | -1.535770 |

### pd-ben (A-s3)

Zero-point correction= 0.470194

Thermal correction to Energy= 0.500941

Thermal correction to Enthalpy= 0.501885

Thermal correction to Gibbs Free Energy= 0.401776

Sum of electronic and zero-point Energies= -1870.818685

Sum of electronic and thermal Energies= -1870.787938

Sum of electronic and thermal Enthalpies= -1870.786994

Sum of electronic and thermal Free Energies= -1870.887104

### Cartesian coordinates

|   |           |           |           |
|---|-----------|-----------|-----------|
| C | -4.986471 | -0.164622 | -0.099757 |
| C | -4.877296 | 0.438545  | -1.365488 |
| C | -5.286667 | 1.754010  | -1.574719 |
| C | -5.824428 | 2.523887  | -0.532760 |
| C | -5.923530 | 1.926682  | 0.732887  |
| C | -5.516201 | 0.610352  | 0.946997  |
| C | -4.562094 | -1.571790 | 0.123606  |
| C | -4.750086 | -2.550207 | -0.870248 |
| C | -4.375753 | -3.875422 | -0.653892 |
| C | -3.804274 | -4.258099 | 0.563259  |
| C | -3.603760 | -3.298605 | 1.559103  |

|    |           |           |           |
|----|-----------|-----------|-----------|
| C  | -3.975620 | -1.970678 | 1.340046  |
| H  | -4.452985 | -0.122389 | -2.193374 |
| H  | -5.188757 | 2.190497  | -2.565526 |
| H  | -6.346778 | 2.492822  | 1.558829  |
| H  | -5.645698 | 0.168704  | 1.930637  |
| H  | -5.230774 | -2.276479 | -1.804369 |
| H  | -4.552899 | -4.616057 | -1.428278 |
| H  | -3.540292 | -5.296515 | 0.741680  |
| H  | -3.170680 | -3.584863 | 2.513504  |
| H  | -3.815939 | -1.236026 | 2.124474  |
| C  | -6.317398 | 3.930088  | -0.774581 |
| H  | -7.365828 | 3.924677  | -1.096580 |
| H  | -6.261393 | 4.538876  | 0.132395  |
| H  | -5.742272 | 4.429661  | -1.559812 |
| C  | 5.175483  | -2.283527 | -0.371805 |
| C  | 4.153833  | -1.349174 | -0.225931 |
| C  | 5.716415  | 0.406891  | -0.169494 |
| C  | 6.777481  | -0.487690 | -0.314682 |
| C  | 6.501670  | -1.847878 | -0.416440 |
| H  | 4.943673  | -3.339303 | -0.449920 |
| H  | 5.857726  | 1.479297  | -0.083976 |
| H  | 7.793522  | -0.111238 | -0.345460 |
| H  | 7.305550  | -2.567838 | -0.529636 |
| C  | 2.711871  | -1.691346 | -0.165682 |
| C  | 2.131069  | -2.955026 | -0.238634 |
| C  | 0.569272  | -0.682671 | 0.061074  |
| C  | 0.732899  | -3.086747 | -0.158238 |
| H  | 2.747057  | -3.839824 | -0.355626 |
| C  | -0.050612 | -1.932615 | -0.002238 |
| H  | -1.128881 | -2.021386 | 0.075436  |
| C  | -0.078183 | 0.641712  | 0.213741  |
| C  | -1.452987 | 0.832383  | 0.302395  |
| C  | -1.958721 | 2.128313  | 0.439443  |
| H  | -2.130361 | -0.012196 | 0.262421  |
| C  | 0.297058  | 2.955251  | 0.392673  |
| C  | -1.073844 | 3.201181  | 0.487350  |
| H  | -3.031096 | 2.281588  | 0.504335  |
| H  | 1.040678  | 3.744764  | 0.420108  |
| H  | -1.424917 | 4.221345  | 0.593546  |
| N  | 4.446238  | -0.014557 | -0.126619 |
| N  | 1.911179  | -0.616684 | -0.022002 |
| N  | 0.776666  | 1.712853  | 0.258800  |
| Pd | 2.760149  | 1.165355  | 0.086791  |
| Cl | 3.762214  | 3.259497  | 0.220789  |



|   |           |           |           |
|---|-----------|-----------|-----------|
| C | 0.094907  | -4.447361 | -0.248825 |
| H | 0.552111  | -5.140796 | 0.464327  |
| H | -0.977567 | -4.401210 | -0.051592 |
| H | 0.239543  | -4.870206 | -1.249563 |

### Ni-ben(B-S3)

Zero-point correction= 0.470812

Thermal correction to Energy= 0.501344

Thermal correction to Enthalpy= 0.502288

Thermal correction to Gibbs Free Energy= 0.403037

Sum of electronic and zero-point Energies= -1913.407760

Sum of electronic and thermal Energies= -1913.377228

Sum of electronic and thermal Enthalpies= -1913.376284

Sum of electronic and thermal Free Energies= -1913.475535

#### Cartesian coordinates

|   |           |           |           |
|---|-----------|-----------|-----------|
| C | 0.752046  | -2.794755 | -1.865019 |
| C | -0.037491 | -1.720165 | -1.474366 |
| C | 1.609336  | -0.194513 | -2.126437 |
| C | 2.451561  | -1.232270 | -2.531096 |
| C | 2.017685  | -2.546403 | -2.402479 |
| H | 0.390250  | -3.809974 | -1.750063 |
| H | 1.892083  | 0.847556  | -2.205629 |
| H | 3.429657  | -0.994543 | -2.932502 |
| H | 2.650314  | -3.372233 | -2.711005 |
| C | -1.384752 | -1.826472 | -0.885276 |
| C | -2.129456 | -2.974070 | -0.616490 |
| C | -3.121105 | -0.453053 | -0.067734 |
| C | -3.408749 | -2.852958 | -0.052084 |
| H | -1.729812 | -3.956305 | -0.841963 |
| C | -3.905156 | -1.566726 | 0.221942  |
| H | -4.894001 | -1.449914 | 0.651153  |
| C | -3.442367 | 0.974009  | 0.122735  |
| C | -4.629472 | 1.462679  | 0.657264  |
| C | -4.802839 | 2.843405  | 0.774764  |
| H | -5.408130 | 0.779512  | 0.976326  |
| C | -2.615156 | 3.140798  | -0.174522 |
| C | -3.783772 | 3.691700  | 0.353630  |
| H | -5.722502 | 3.244107  | 1.188465  |
| H | -1.787421 | 3.748509  | -0.521129 |
| H | -3.878185 | 4.769184  | 0.425497  |
| N | 0.394424  | -0.430392 | -1.613629 |
| N | -1.901696 | -0.619348 | -0.606846 |

|    |           |           |           |
|----|-----------|-----------|-----------|
| N  | -2.446527 | 1.815650  | -0.287298 |
| Cl | 0.277278  | 2.672455  | -1.493046 |
| C  | -4.227284 | -4.073451 | 0.274265  |
| H  | -3.916021 | -4.936638 | -0.318059 |
| H  | -4.108804 | -4.336217 | 1.332361  |
| H  | -5.291789 | -3.897417 | 0.098912  |
| Ni | -0.886363 | 0.892059  | -0.993915 |
| C  | 3.122876  | 0.037174  | 1.384975  |
| C  | 3.334333  | 1.184807  | 0.600466  |
| C  | 4.590129  | 1.464299  | 0.063267  |
| C  | 5.685045  | 0.618648  | 0.288958  |
| C  | 5.472506  | -0.526229 | 1.069702  |
| C  | 4.220556  | -0.811557 | 1.609331  |
| C  | 1.789043  | -0.268274 | 1.963577  |
| C  | 0.929923  | 0.759924  | 2.394727  |
| C  | -0.310216 | 0.469684  | 2.965841  |
| C  | -0.724795 | -0.855756 | 3.120995  |
| C  | 0.113495  | -1.888050 | 2.692382  |
| C  | 1.351289  | -1.596714 | 2.118274  |
| H  | 2.507527  | 1.855909  | 0.386557  |
| H  | 4.721400  | 2.358864  | -0.540867 |
| H  | 6.304512  | -1.196139 | 1.272167  |
| H  | 4.103195  | -1.688128 | 2.239838  |
| H  | 1.254945  | 1.792744  | 2.319694  |
| H  | -0.937864 | 1.282071  | 3.322290  |
| H  | -1.676651 | -1.081780 | 3.593377  |
| H  | -0.189035 | -2.924138 | 2.819519  |
| H  | 1.990140  | -2.409525 | 1.785572  |
| C  | 7.053683  | 0.948317  | -0.256095 |
| H  | 7.628491  | 1.543712  | 0.463897  |
| H  | 7.633660  | 0.043862  | -0.462470 |
| H  | 6.989697  | 1.532007  | -1.179109 |

### **pd0-ben-2 (C-S3)**

Zero-point correction= 0.463320

Thermal correction to Energy= 0.493222

Thermal correction to Enthalpy= 0.494166

Thermal correction to Gibbs Free Energy= 0.397817

Sum of electronic and zero-point Energies= -1410.733277

Sum of electronic and thermal Energies= -1410.703375

Sum of electronic and thermal Enthalpies= -1410.702431

Sum of electronic and thermal Free Energies= -1410.798780

Cartesian coordinates

|    |           |           |           |
|----|-----------|-----------|-----------|
| C  | -3.304909 | 2.371678  | 1.329954  |
| C  | -2.340124 | 1.939398  | 0.409138  |
| C  | -3.724532 | 0.257588  | -0.341453 |
| C  | -4.745365 | 0.627373  | 0.533638  |
| C  | -4.525732 | 1.704513  | 1.392892  |
| H  | -3.092775 | 3.199805  | 1.998213  |
| H  | -3.847310 | -0.579858 | -1.021488 |
| H  | -5.684505 | 0.083171  | 0.539635  |
| H  | -5.286602 | 2.015017  | 2.102965  |
| C  | -1.029529 | 2.620817  | 0.269045  |
| C  | -0.902774 | 4.002271  | 0.441438  |
| C  | 1.217512  | 2.428141  | -0.280052 |
| C  | 0.336054  | 4.622781  | 0.251873  |
| H  | -1.776359 | 4.597418  | 0.688042  |
| C  | 1.404368  | 3.806988  | -0.126965 |
| H  | 2.374023  | 4.246687  | -0.337177 |
| C  | 2.320241  | 1.541446  | -0.722433 |
| C  | 3.658049  | 1.802458  | -0.392336 |
| C  | 4.652814  | 0.950207  | -0.861208 |
| H  | 3.909367  | 2.645504  | 0.242593  |
| C  | 2.929520  | -0.338001 | -1.913051 |
| C  | 4.282005  | -0.142224 | -1.647880 |
| H  | 5.694123  | 1.128105  | -0.610086 |
| H  | 2.599709  | -1.181039 | -2.515699 |
| H  | 5.021630  | -0.829986 | -2.044928 |
| N  | -2.543974 | 0.885875  | -0.408971 |
| N  | 0.020687  | 1.841634  | -0.065438 |
| N  | 1.958201  | 0.471087  | -1.465634 |
| Pd | -0.239969 | -0.354090 | -0.646572 |
| C  | 0.504863  | 6.110041  | 0.436280  |
| H  | -0.384153 | 6.656993  | 0.108302  |
| H  | 0.666146  | 6.355308  | 1.493421  |
| H  | 1.364948  | 6.487940  | -0.123277 |
| C  | -0.148684 | -2.445929 | 0.401275  |
| C  | -0.298901 | -2.490243 | -1.026252 |
| C  | -1.562849 | -2.838158 | -1.588448 |
| C  | -2.668034 | -3.115949 | -0.798874 |
| C  | -2.523255 | -3.034844 | 0.608436  |
| C  | -1.312361 | -2.699309 | 1.185035  |
| C  | 1.189808  | -2.457656 | 1.058530  |
| C  | 2.273329  | -3.149030 | 0.487772  |
| C  | 3.513350  | -3.201364 | 1.125166  |

|   |           |           |           |
|---|-----------|-----------|-----------|
| C | 3.702280  | -2.574071 | 2.357041  |
| C | 2.631945  | -1.892547 | 2.943860  |
| C | 1.396155  | -1.834851 | 2.304863  |
| H | 0.579960  | -2.583353 | -1.661996 |
| H | -1.642103 | -2.919763 | -2.670106 |
| H | -3.373775 | -3.263352 | 1.246721  |
| H | -1.220288 | -2.696851 | 2.267473  |
| H | 2.134858  | -3.672595 | -0.453493 |
| H | 4.330517  | -3.748733 | 0.662059  |
| H | 4.666337  | -2.618251 | 2.855767  |
| H | 2.763114  | -1.396439 | 3.902127  |
| H | 0.581935  | -1.277386 | 2.758138  |
| C | -3.986490 | -3.536946 | -1.406347 |
| H | -4.249376 | -4.562373 | -1.117565 |
| H | -4.813389 | -2.896941 | -1.073468 |
| H | -3.954411 | -3.498533 | -2.499168 |
